# Supplementary material for: Reduced mitochondrial calcium uptake in macrophages is a major driver of inflammaging
Source: PubMed Central journal article supplement (PMC10353943; doi:10.1038/s43587-023-00436-8), 2023-06-05
Supplement: 43587_2023_436_MOESM1_ESM.pdf [file 43587_2023_436_MOESM1_ESM.pdf]

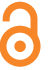

# Reduced mitochondrial calcium uptake in macrophages is a major driver of inflammaging

---

In the format provided by the authors and unedited

---

# Supplementary Figure 1

Uncropped MICU1 gel for Extended Data Fig. 3a

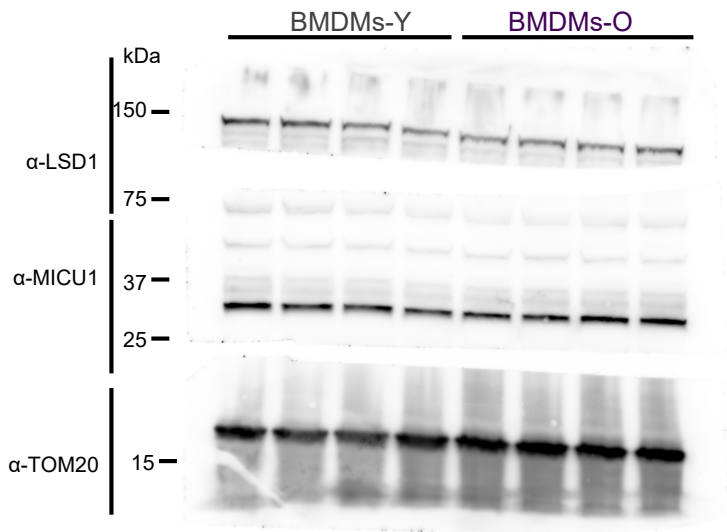

Uncropped MCU Native Gel  
Extended Data Fig 3c

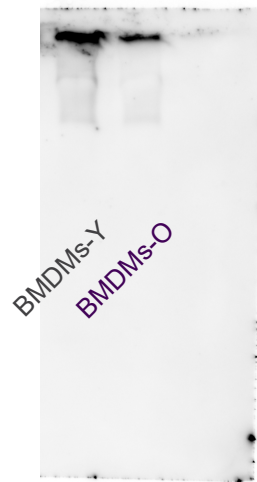

Uncropped Caspase1 gel for Fig. 6g-h

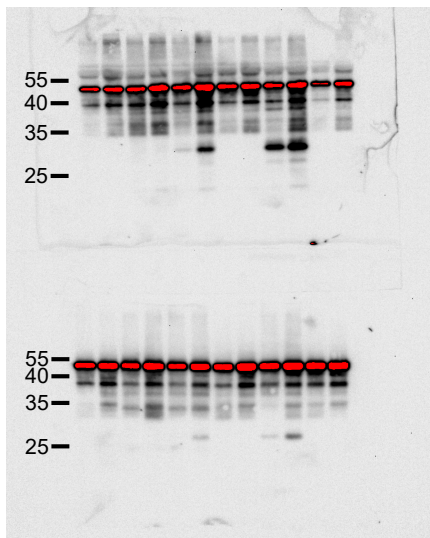

Uncropped GAPDH gel for Fig. 6g-h

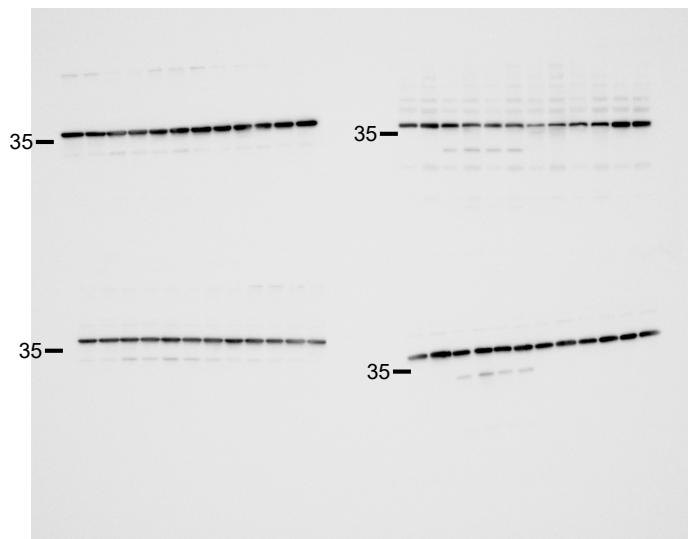

Uncropped GSDMD gel for Fig. 6g-h

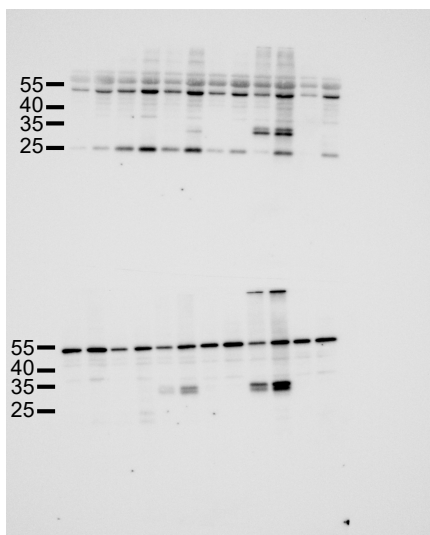

## Primers for qPCR

Arg1 Ms Forward (5' – CTGACAACCAGCTCTGGGAA – 3'), Arg1 Ms Reverse (5' – TCCTGGTACATCTGGGAACTTT – 3'), Fizz1 Ms Forward (5' – ACTTCTTGCCAATCCAGCTAAC – 3'), Fizz1 Ms Reverse (5' – CACCCAGTAGCAGTCATCCC – 3'), CD206 Ms Forward (5' – TTCAGCTATTGGACGCGAGG – 3'), CD206 Ms Reverse (5' – GAATCTGACACCCAGCGGAA – 3'), McuB Ms Forward (5' – GCCTTCCCTTGGTAACCCTC – 3'), McuB Ms Reverse (5' – ATTTCACTGCCATCTGCCGT – 3'), EMRE Ms Forward (5' – AGAACTTCGCTGCTCTGCTT – 3'), EMRE Ms Reverse (5' – GCTCCCTGTGCCCTGTTAAT – 3'), Micu2 Ms Forward (5' – AAGGTAGCGACTGGACAGGA – 3'), Micu2 Ms Reverse (5' – TGTGACACCCATAAGCCTCG – 3'), Micu1 Ms Forward (5' – AATTGCCAGGAACGAGAAA – 3'), Micu1 Ms Reverse (5' – GAGGACTGTTGTGAGGAAGATG – 3'), Mcu Ms Forward 1 (5' – TGAACGACGTGAAGACCCTG – 3'), Mcu Ms Reverse 1 (5' – TTCGTACCTTCTCCAGGGGG – 3'), Mcu Ms Forward 2 (5' – CCCCTGGAGAAGGTACGAA – 3'), IL-1 $\beta$  Ms Forward (5' – GCAACTGTTCTGAACTCAACT – 3'), IL-1 $\beta$  Ms Reverse (5' – ATCTTTGGGGTCCGTC AACT – 3'), iNOS Ms Forward (5' – GTTCTCAGCCAACAATAACAAGA – 3'), iNOS Ms Reverse (5' – GTGGACGGGTGATGTAC – 3'), IL-6 Ms Forward (5' – TAGTCCTTCTACCCAATTTCC – 3'), IL-6 Ms Reverse (5' – TTGGTCCTTAGCCACTCCTTC – 3'), TNF $\alpha$  Ms Forward (5' – CCCTCACACTCAGATCATCTTCT – 3'), TNF $\alpha$  Ms Reverse (5' – GCTACGACGTGGGCTACAG – 3'), Itpr1 Ms Forward (5' – CAAGCAACTGCTGGAGGAGA – 3'), Itpr1 Ms Reverse (5' – TTCAAGCTCCTGCTCTGTGG – 3'), Itpr2 Ms Forward (5' – ACAGCAACGTTATCCAAGTGC – 3'), Itpr2 Ms Reverse (5' – CAGCATTACATTATCACCCCTCG – 3'), Itpr3 Ms Forward (5' – GGGCCGAAGCCATGAATGAA – 3'), Itpr3 Ms Reverse (5' – CACACTTTGAAGAGGCAATCTCG – 3'), IL-1 $\beta$  Human Forward (5' – TCGCCAGTGAAATGATGGCT – 3'), IL-1 $\beta$  Human Reverse (5' – TGGAAGGAGCACTTCATCTGTT – 3'), IL-6 Human Forward (5' – TTCTCCACAAGCGCCTTC – 3'), IL-6 Human Reverse (5' – GGCGGCTACATCTTTGGAAT – 3'), TNF $\alpha$  Human Forward (5' – CCTGCTGCACTTTGGAGTGA – 3'), TNF $\alpha$  Human Reverse (5' – CAGCTTGAGGGTTTGTACAAC – 3'), IL-10 Human Forward (5' – TACGGCGCTGTCATCGATTT – 3'), IL-10 Human Reverse (5' – TAGAGTCGCCACCCTGATGT – 3').

## siRNA

siRNA used for Mcu knockdown: Dharmacon Cat# L-015519-0-0005, ON-TARGETplus Human MCU (90550) siRNA – SMARTpool, 5nmol. ON-TARGETplus SMARTpool siRNA J-015519-17, MCU Target Sequence: GAUCAGGCAUUGUGGAAUA; ON-TARGETplus SMARTpool siRNA J-015519-18, MCU Target Sequence: GUUUUGACCUAGAGAAUA; ON-TARGETplus SMARTpool siRNA J-015519-19, MCU Target Sequence: ACUGAGAGACCCAUUACAA; ON-TARGETplus SMARTpool siRNA J-015519-20, MCU Target Sequence: GUAAUGACACGCCAGGAAU.
